# Supplementary material for: Optimizing CdS intermediate layer of CdS/CdSe quantum dot-sensitized solar cells to increase light harvesting ability and improve charge separation efficiency
Source: Royal Society of Chemistry journal article supplement (doi:10.1039/c6ra15937k), 2016-01-01
Supplement: c6ra15937k1.pdf [file c6ra15937k1.pdf]

## Supporting Information

# Optimizing CdS Intermediate Layer of CdS/CdSe Quantum Dot-Sensitized Solar Cells to Increase Light Harvesting Ability and Improve Charge Separation Efficiency

*Jiaqiao Jiang, Kefeng Wang\*, Qingqing Liu and Jin Zhai\**

Key Laboratory of Bio-Inspired Smart Interfacial Science and Technology of Ministry of Education, Beijing Key Laboratory of Bio-inspired Energy Materials and Devices, School of Chemistry and Environment, Beihang University, Beijing, 100191, P. R. China. E-mail: zhaijin@buaa.edu.cn

Henan Key Laboratory of Biomolecular Recognition and Sensing, Shangqiu Normal University, Shangqiu, 476000, P. R. China. E-mail: wangkf2007@163.com

1. *J-V* curves of QDSSCs based on TEA-CdS and CdS sensitized photoanodes.

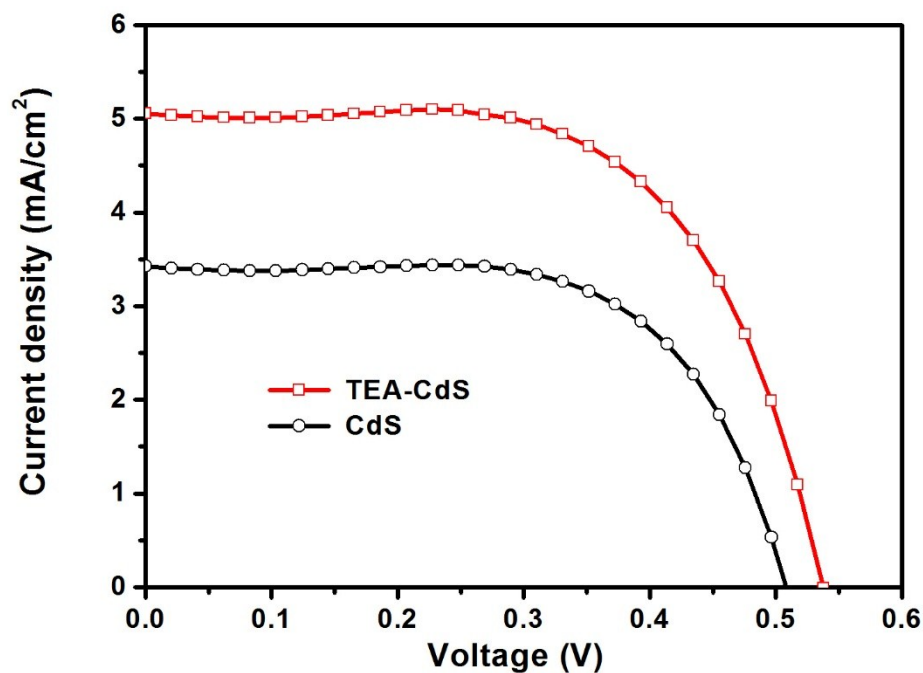

**Fig. S1.** *J-V* curves of QDSSCs based on TEA-CdS and CdS sensitized photoanodes. The measurements were carried out under the illumination of an AM 1.5G simulated sunlight with a power density of 100 mW/cm<sup>2</sup>. PbS formed on the Pb foil as the counter electrode and polysulfide in methanol-water solution as the electrolyte.

2. IPCE spectra of the QDSSCs based on CdS and TEA-CdS sensitized photoanodes.

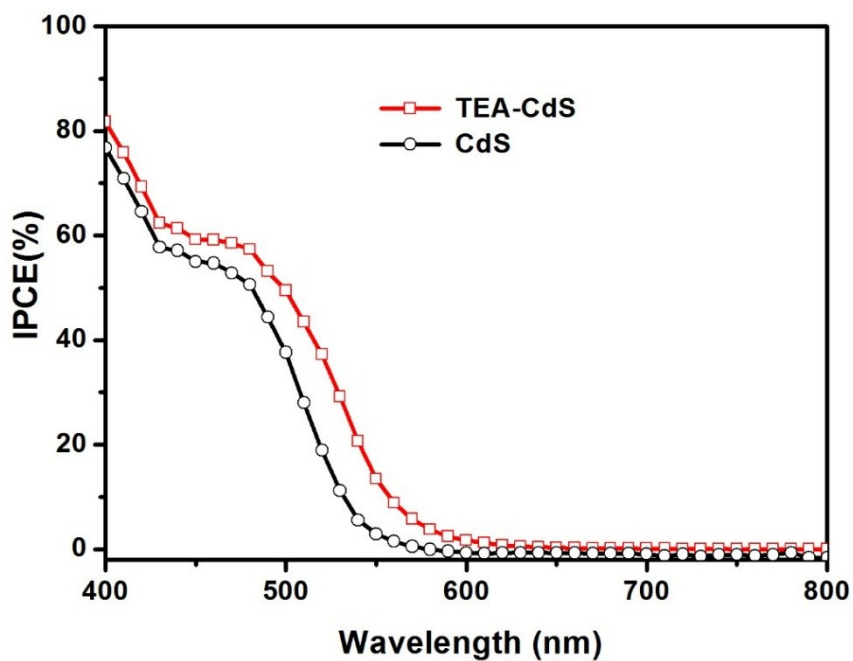

**Fig. S2.** IPCE spectra of the QDSSCs based on CdS and TEA-CdS sensitized photoanodes.

### 3. Corresponding photovoltaic parameters for different QDSSCs.

**Table S1.** Corresponding photovoltaic parameters for different solar cells.

|         | $J_{sc}$ (mA/cm <sup>2</sup> ) | $V_{oc}$ (V) | FF   | PCE (%) |
|---------|--------------------------------|--------------|------|---------|
| CdS     | 3.43                           | 0.51         | 0.61 | 1.12    |
| TEA-CdS | 5.05                           | 0.54         | 0.63 | 1.70    |

### 4. Stability of TEA-CdS/CdSe QDSSCs.

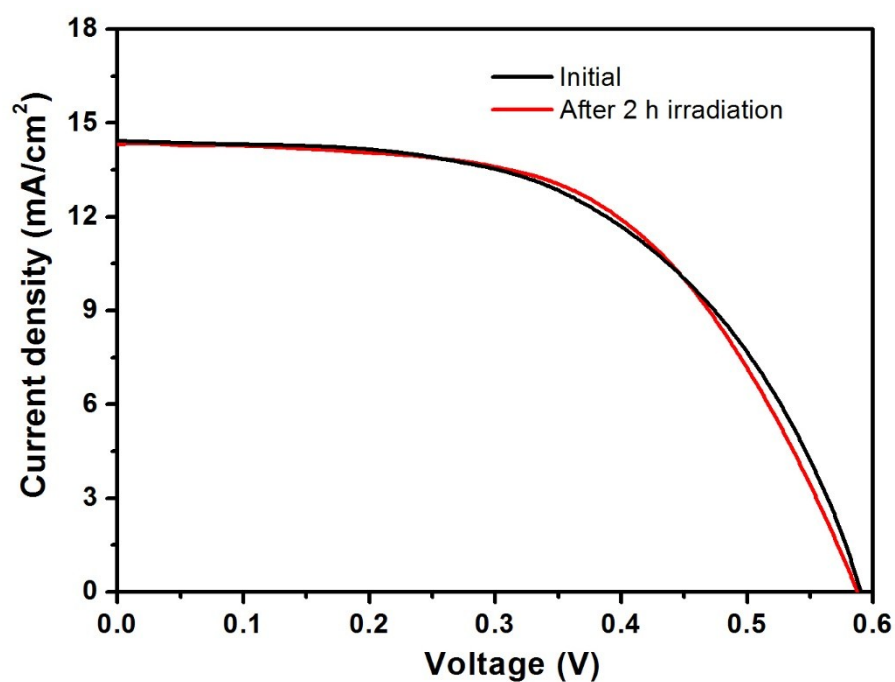

**Fig. S3.** J-V curves of QDSSCs based on TEA-CdS/CdSe sensitized electrodes. The measurements were carried out under the illumination of an AM 1.5G simulated sunlight with a power density of 100 mW/cm<sup>2</sup>. PbS formed on the Pb foil as the counter electrode and polysulfide in methanol-water solution as the electrolyte.

The red curve was measured 2 hours later than the black curve, and they were still nearly coincident, so the solar cells kept stable in this condition.
